# Supplementary material for: Defining the Schistosoma haematobium kinome enables the prediction of essential kinases as anti-schistosome drug targets
Source: PubMed Central journal article supplement (PMC4669435; doi:10.1038/srep17759), 2015-12-04

## Supplementary Figures

### Defining the *Schistosoma haematobium* kinome enables the prediction of essential kinases as anti-schistosome drug targets

Andreas J. Stroehlein<sup>1</sup>, Neil D. Young<sup>1</sup>, Aaron R. Jex<sup>1</sup>, Paul W. Sternberg<sup>2</sup>, Patrick Tan<sup>3,4</sup>, Peter R. Boag<sup>5</sup>, Andreas Hofmann<sup>1,6</sup> & Robin B. Gasser<sup>1</sup>

<sup>1</sup>Faculty of Veterinary and Agricultural Sciences, The University of Melbourne, Parkville, Victoria, Australia, <sup>2</sup>HHMI, Division of Biology, California Institute of Technology, Pasadena, California, USA, <sup>3</sup>Genome Institute of Singapore, Republic of Singapore, <sup>4</sup>Cancer and Stem Cell Biology, Duke-NUS Graduate Medical School, Republic of Singapore, <sup>5</sup>Faculty of Medicine, Nursing and Health Sciences, Monash University, Clayton, Victoria, Australia, <sup>6</sup>Structural Chemistry Program, Eschitis Institute, Griffith University, Brisbane, Australia

**Supplementary Figures 1 to 11. Phylogenetic analysis of individual eukaryotic protein kinase (ePK) groups and protein kinase-like (PKL) families of *Schistosoma haematobium* and *S. mansoni*.** Following the alignment of amino acid sequences representing CMGC, CAMK, AGC, Other, TK, STE, TKL, CK1, RGC groups and RIO and ABC kinase families, phylogenetic trees were constructed. High-resolution figures of individual trees including nodal support values and sequence identifiers are given.









# Supplementary Figure 5. TK kinase group

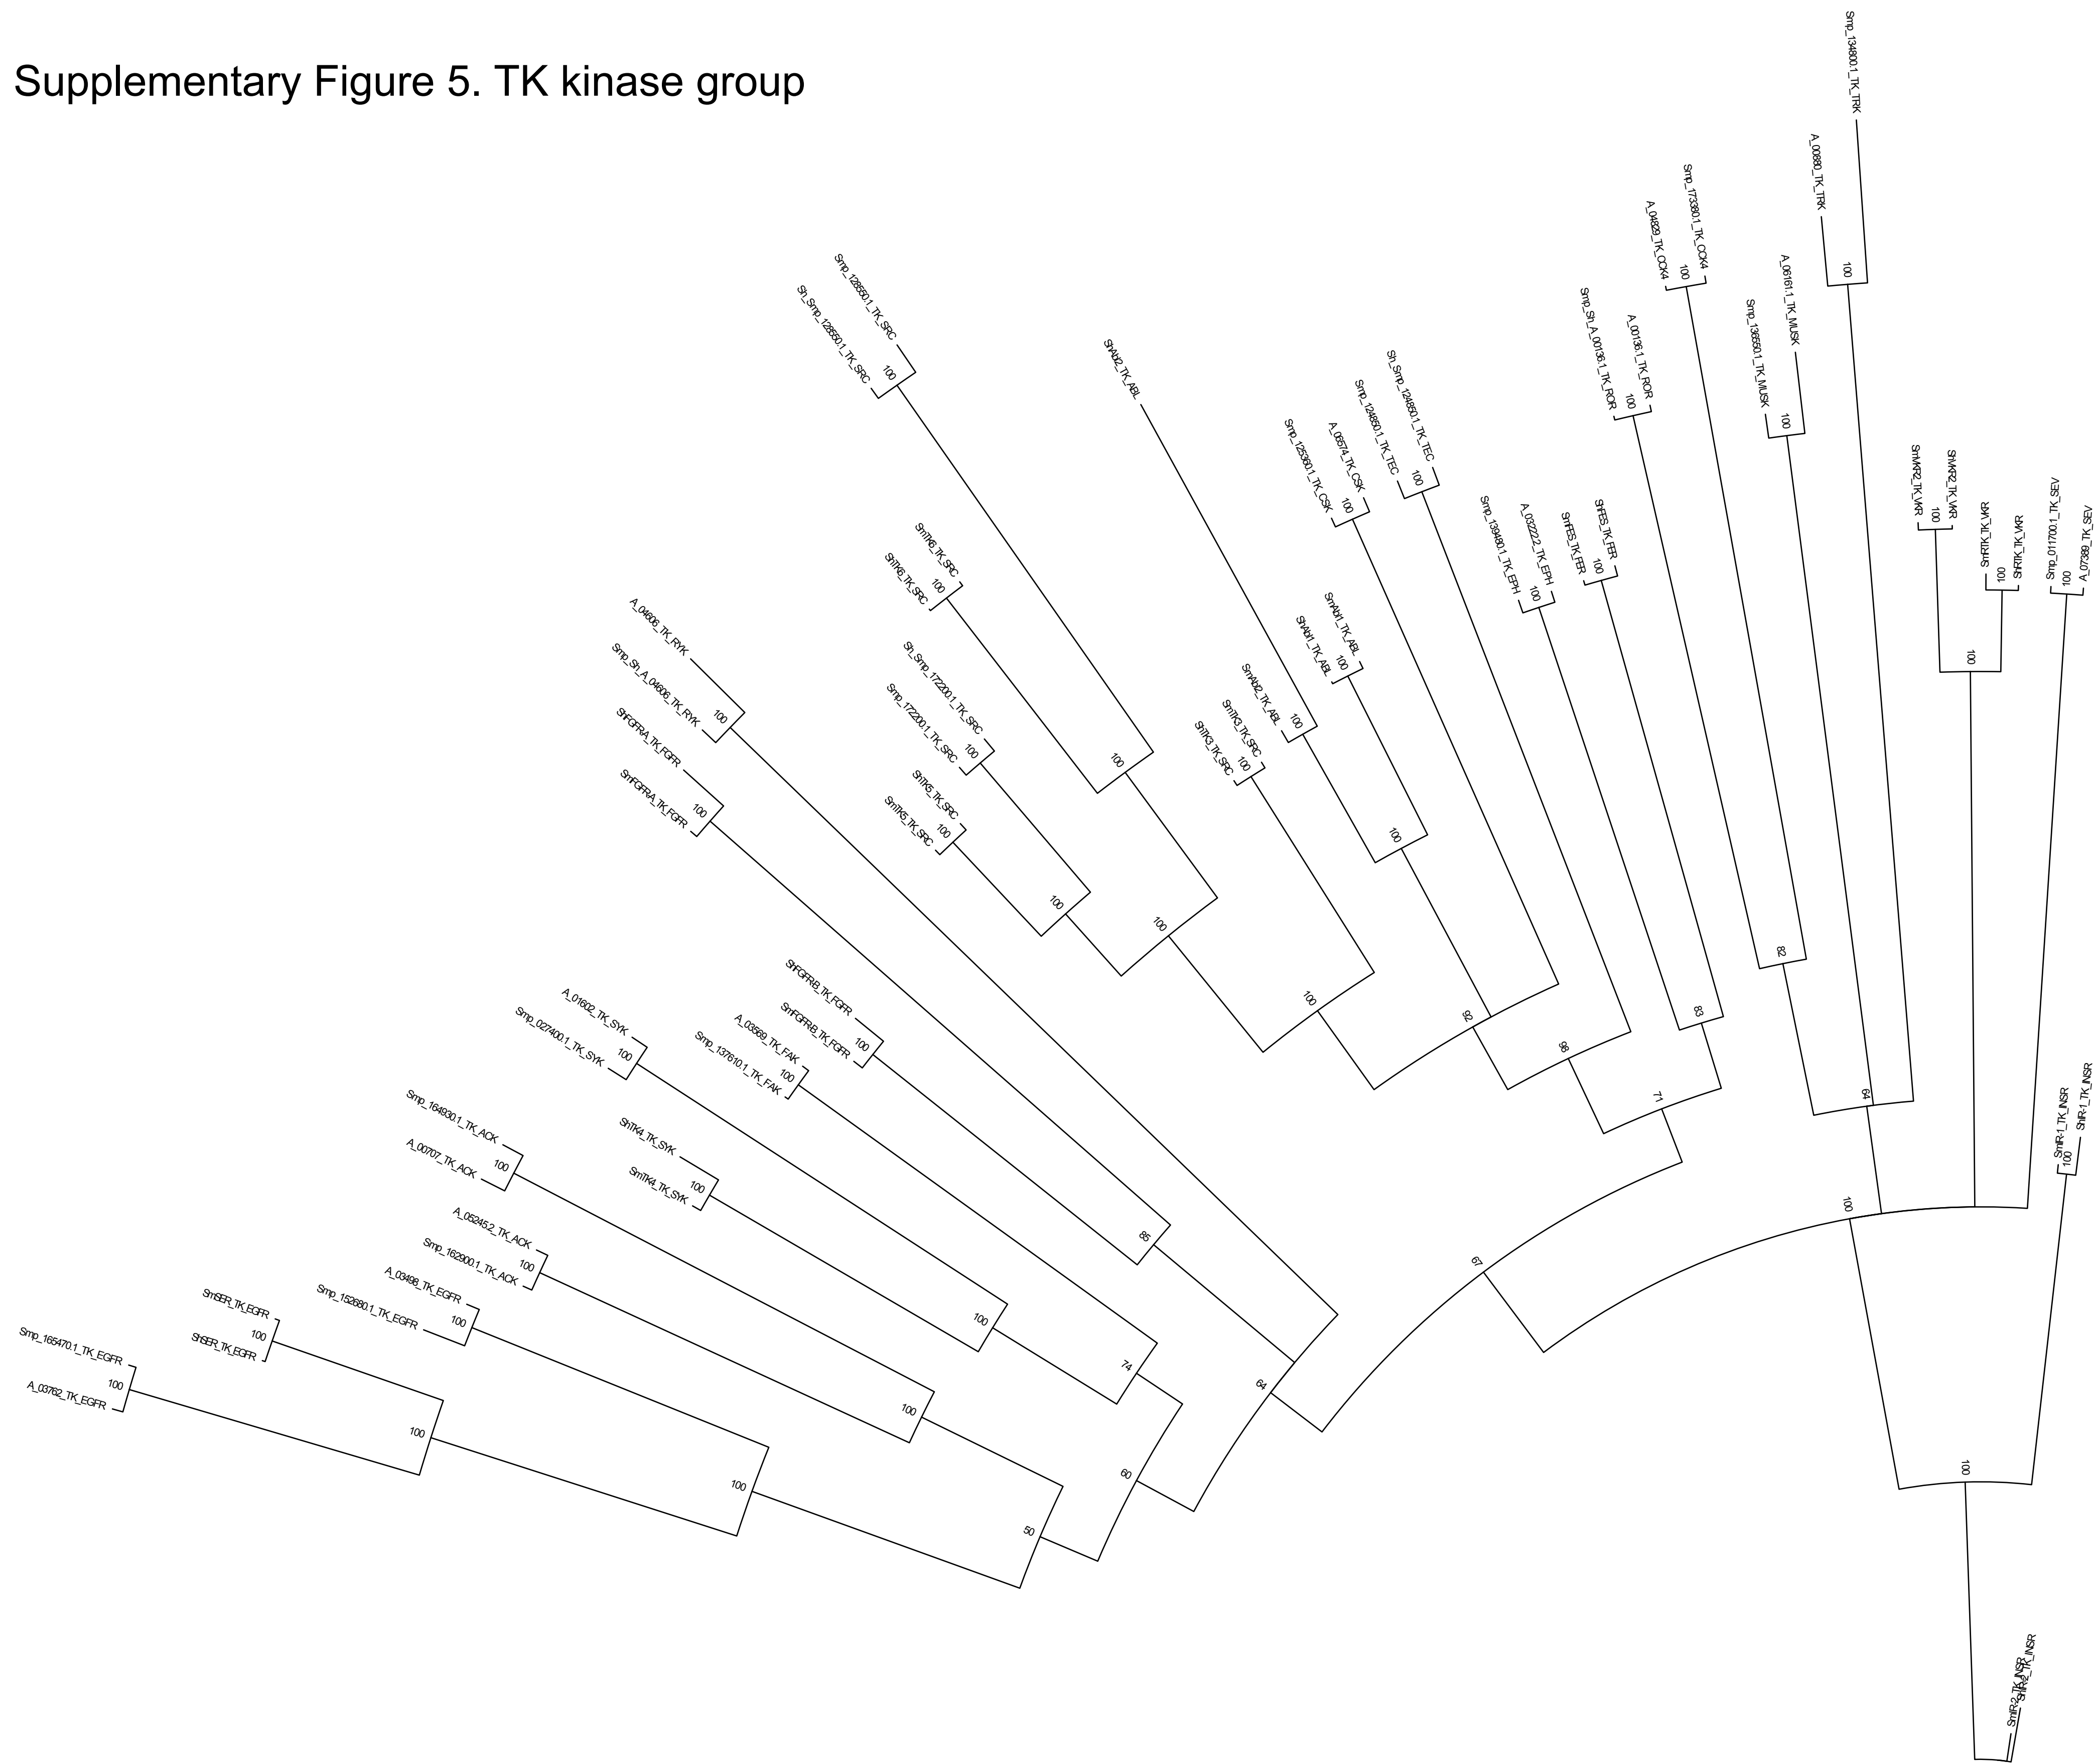







# Supplementary Figure 8. CK1 kinase group

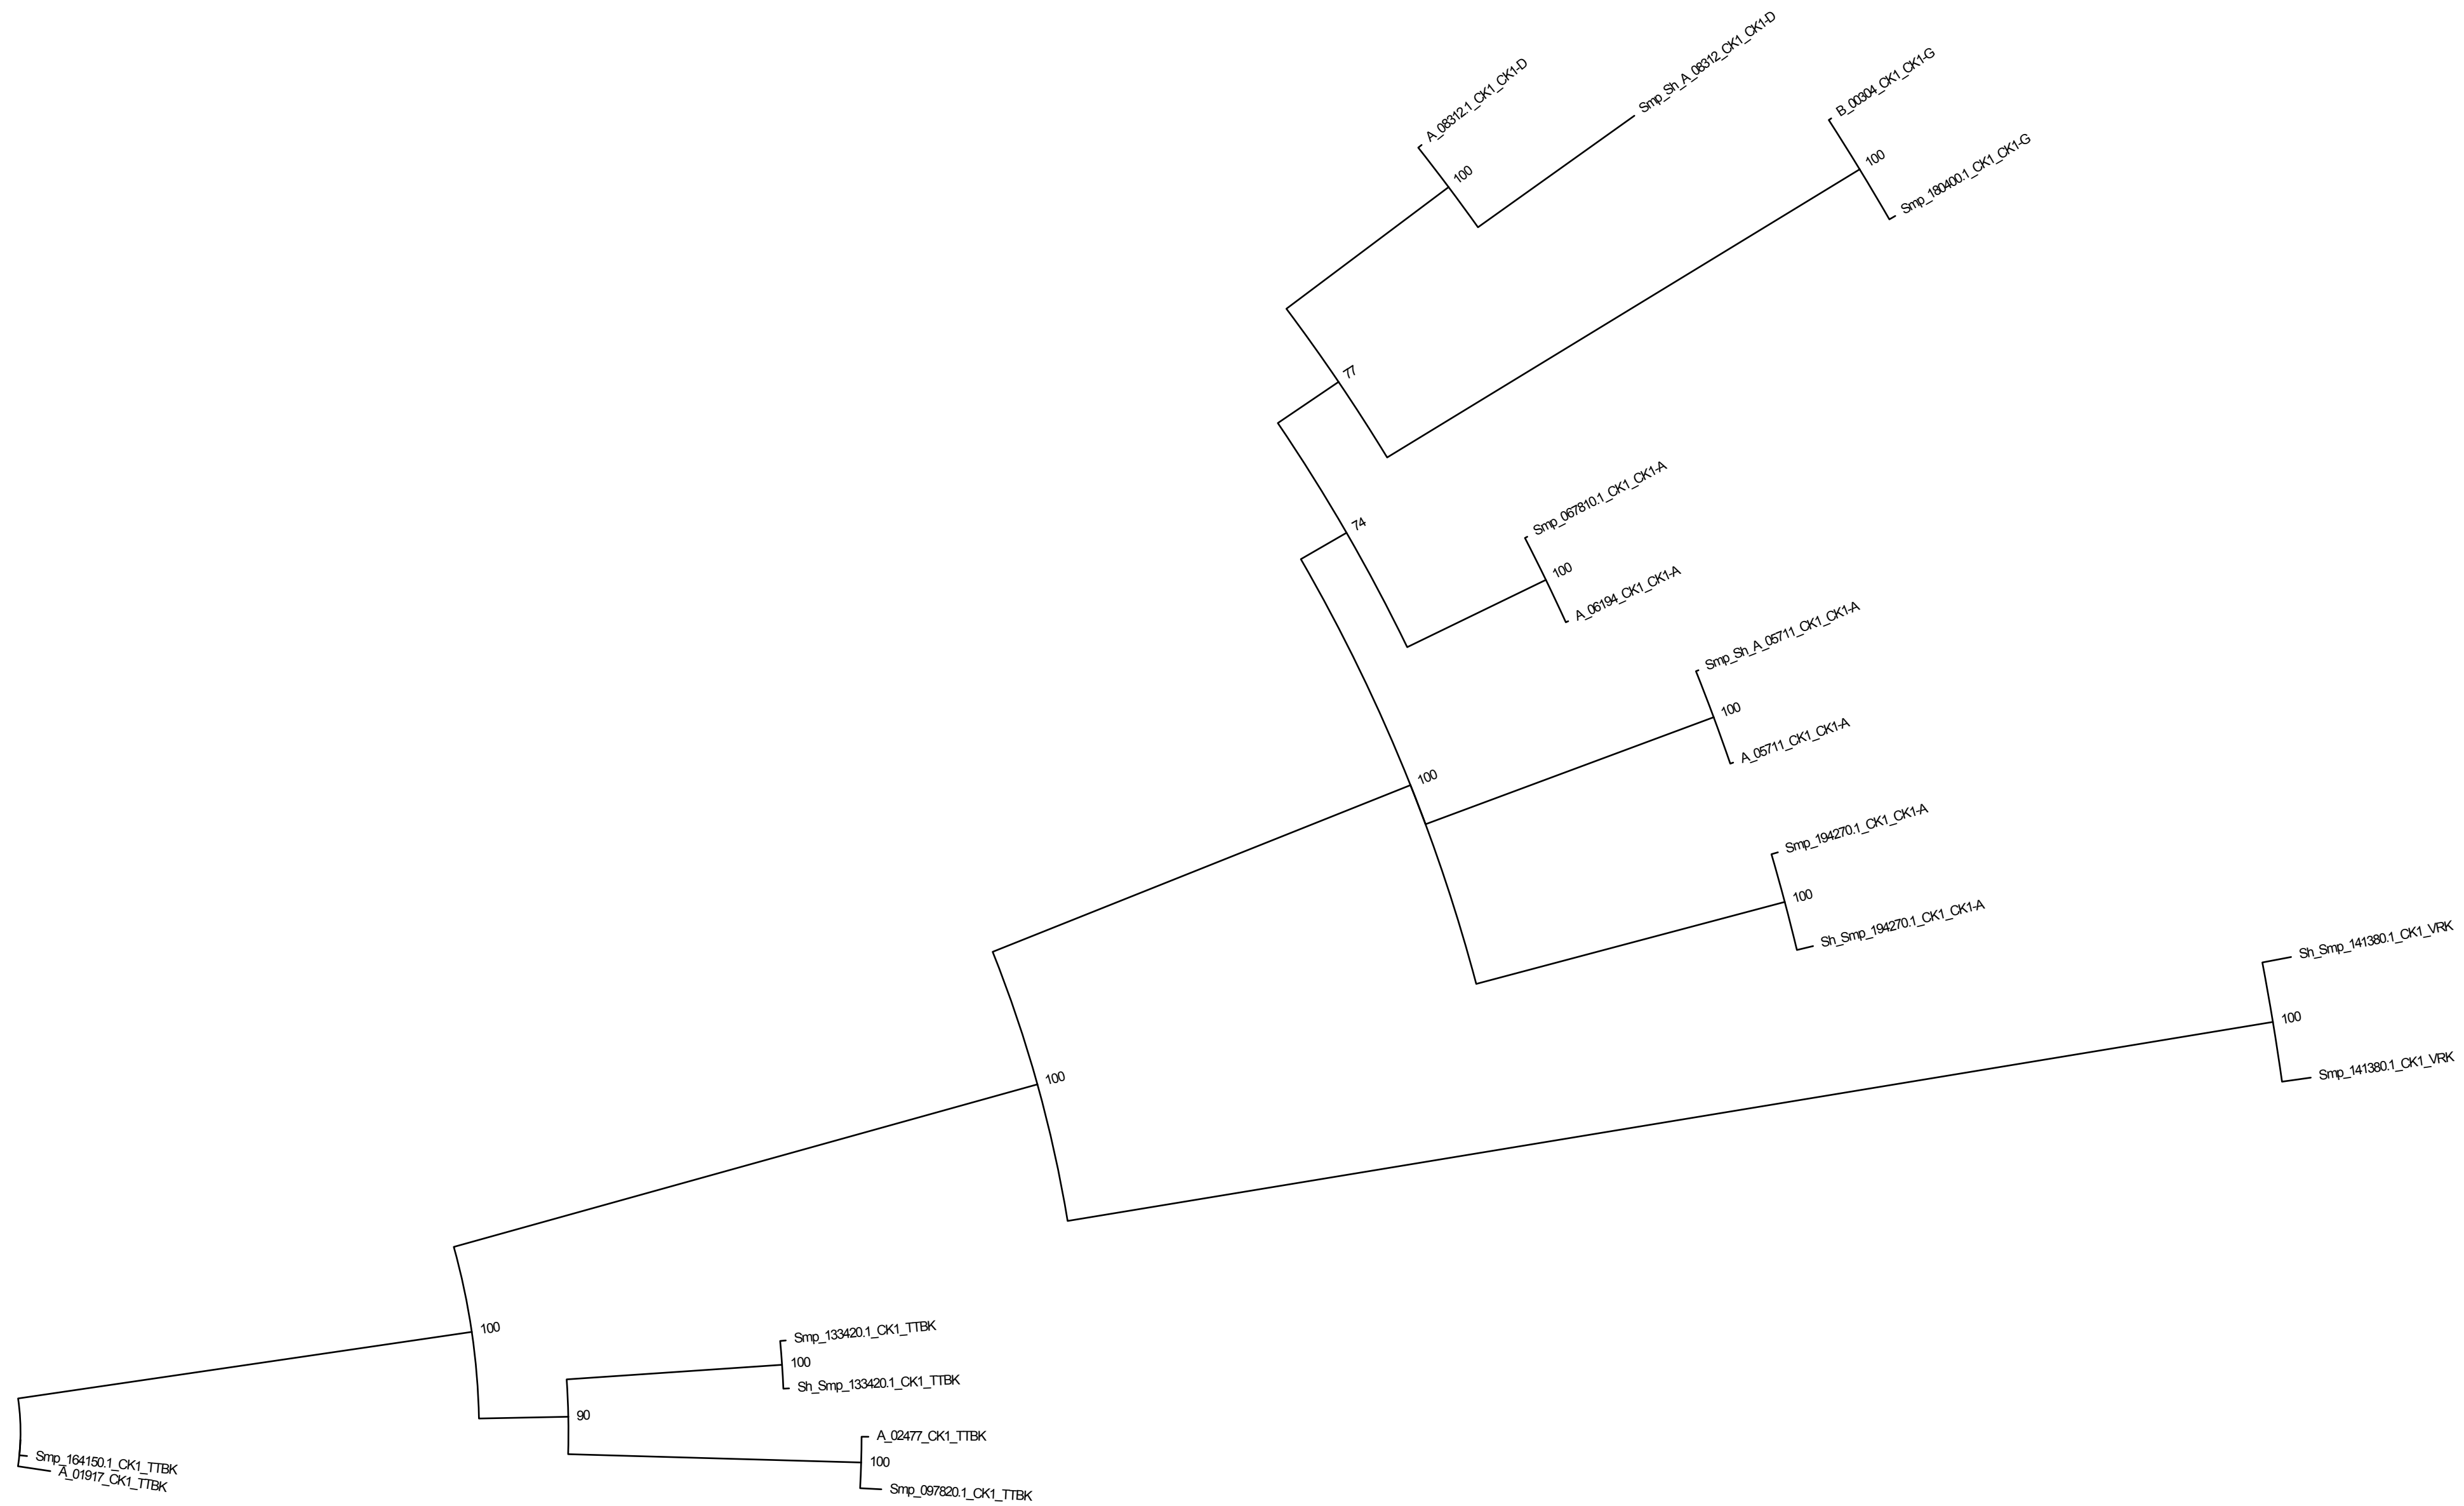

# Supplementary Figure 9. RGC kinase group

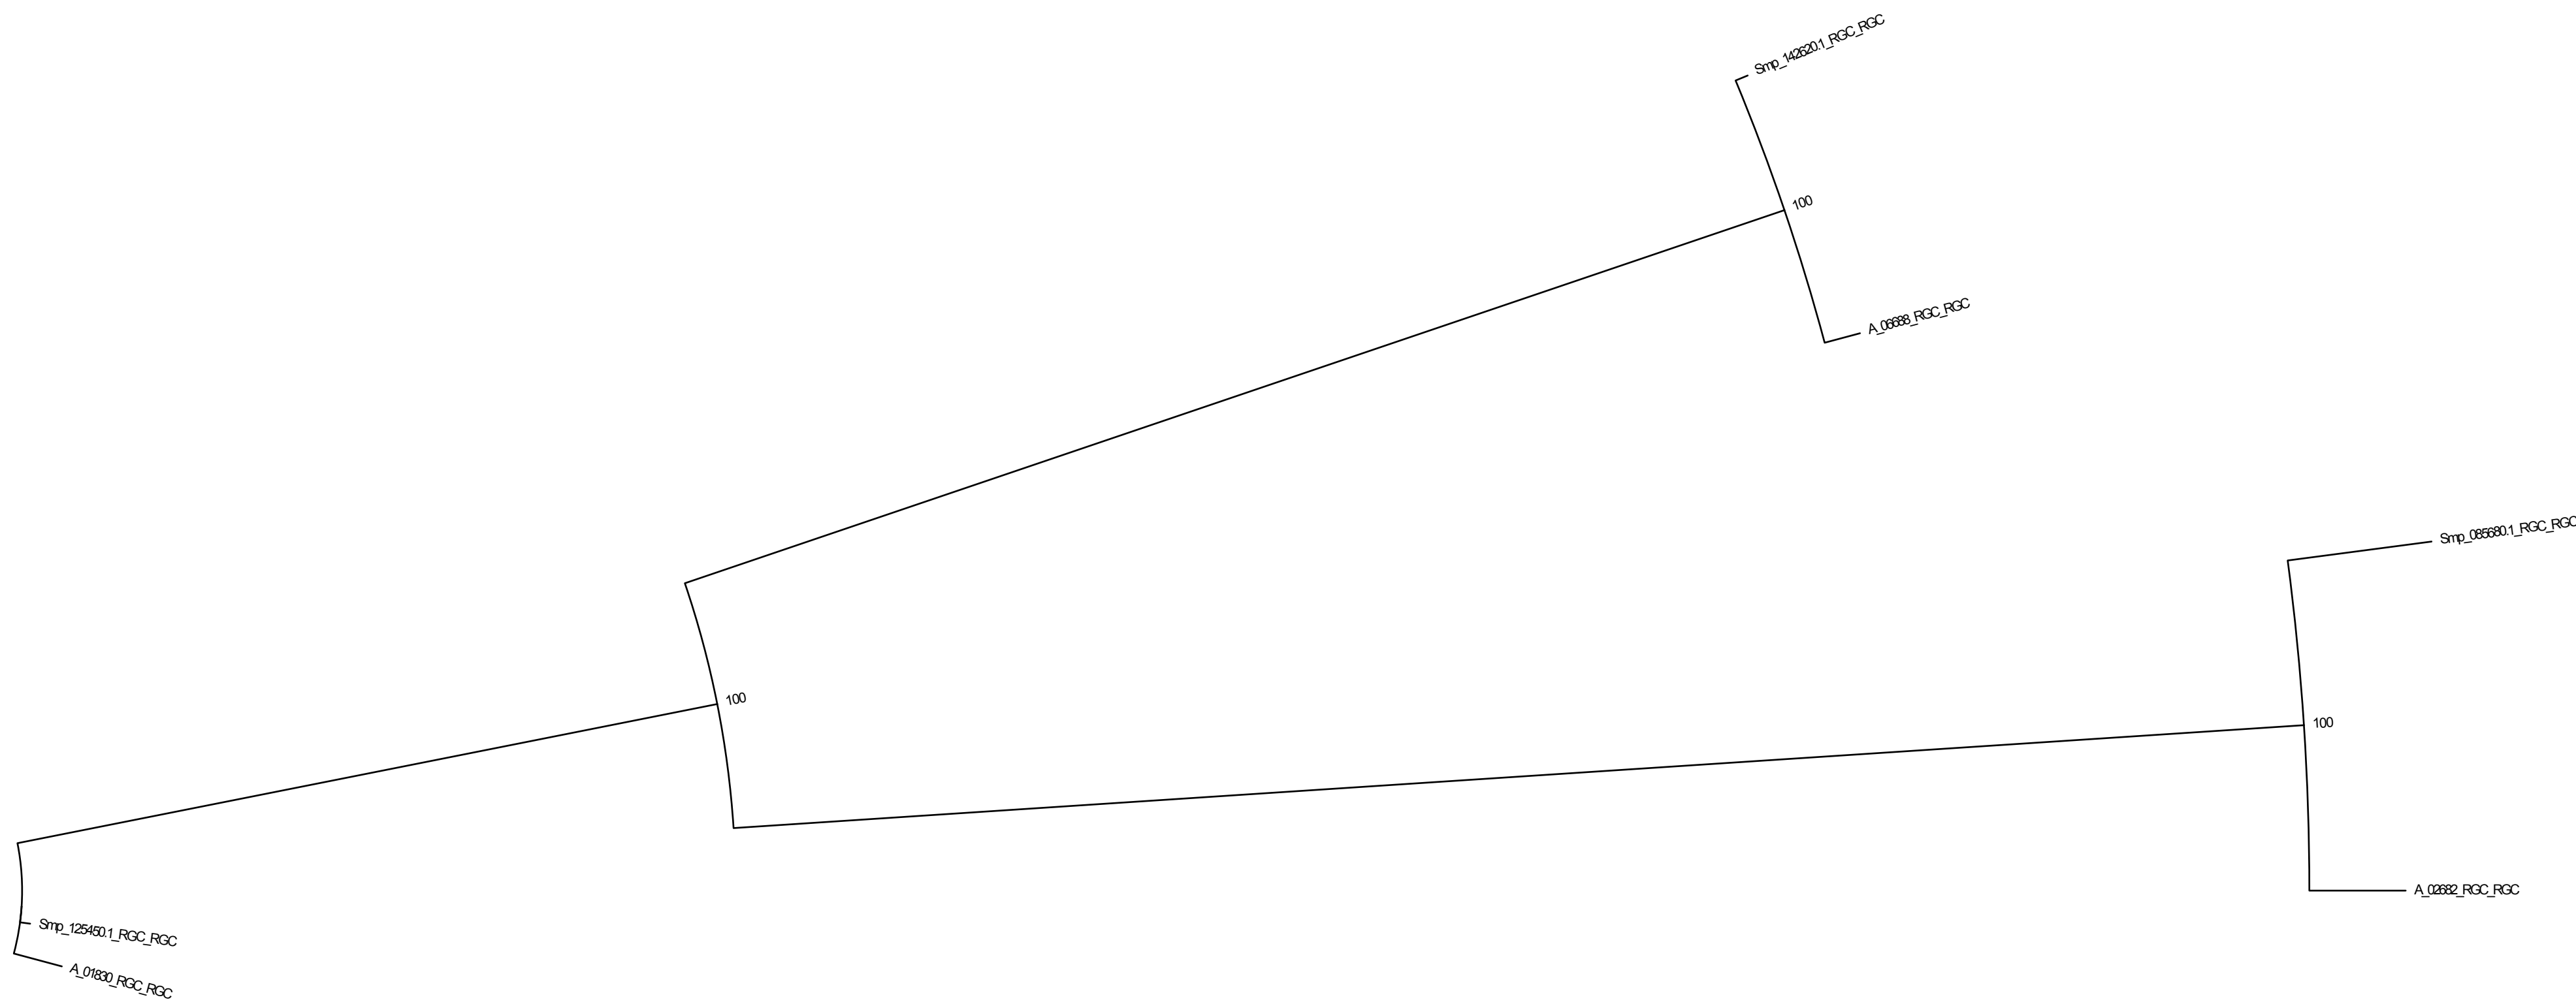

# Supplementary Figure 10. RIO kinase family

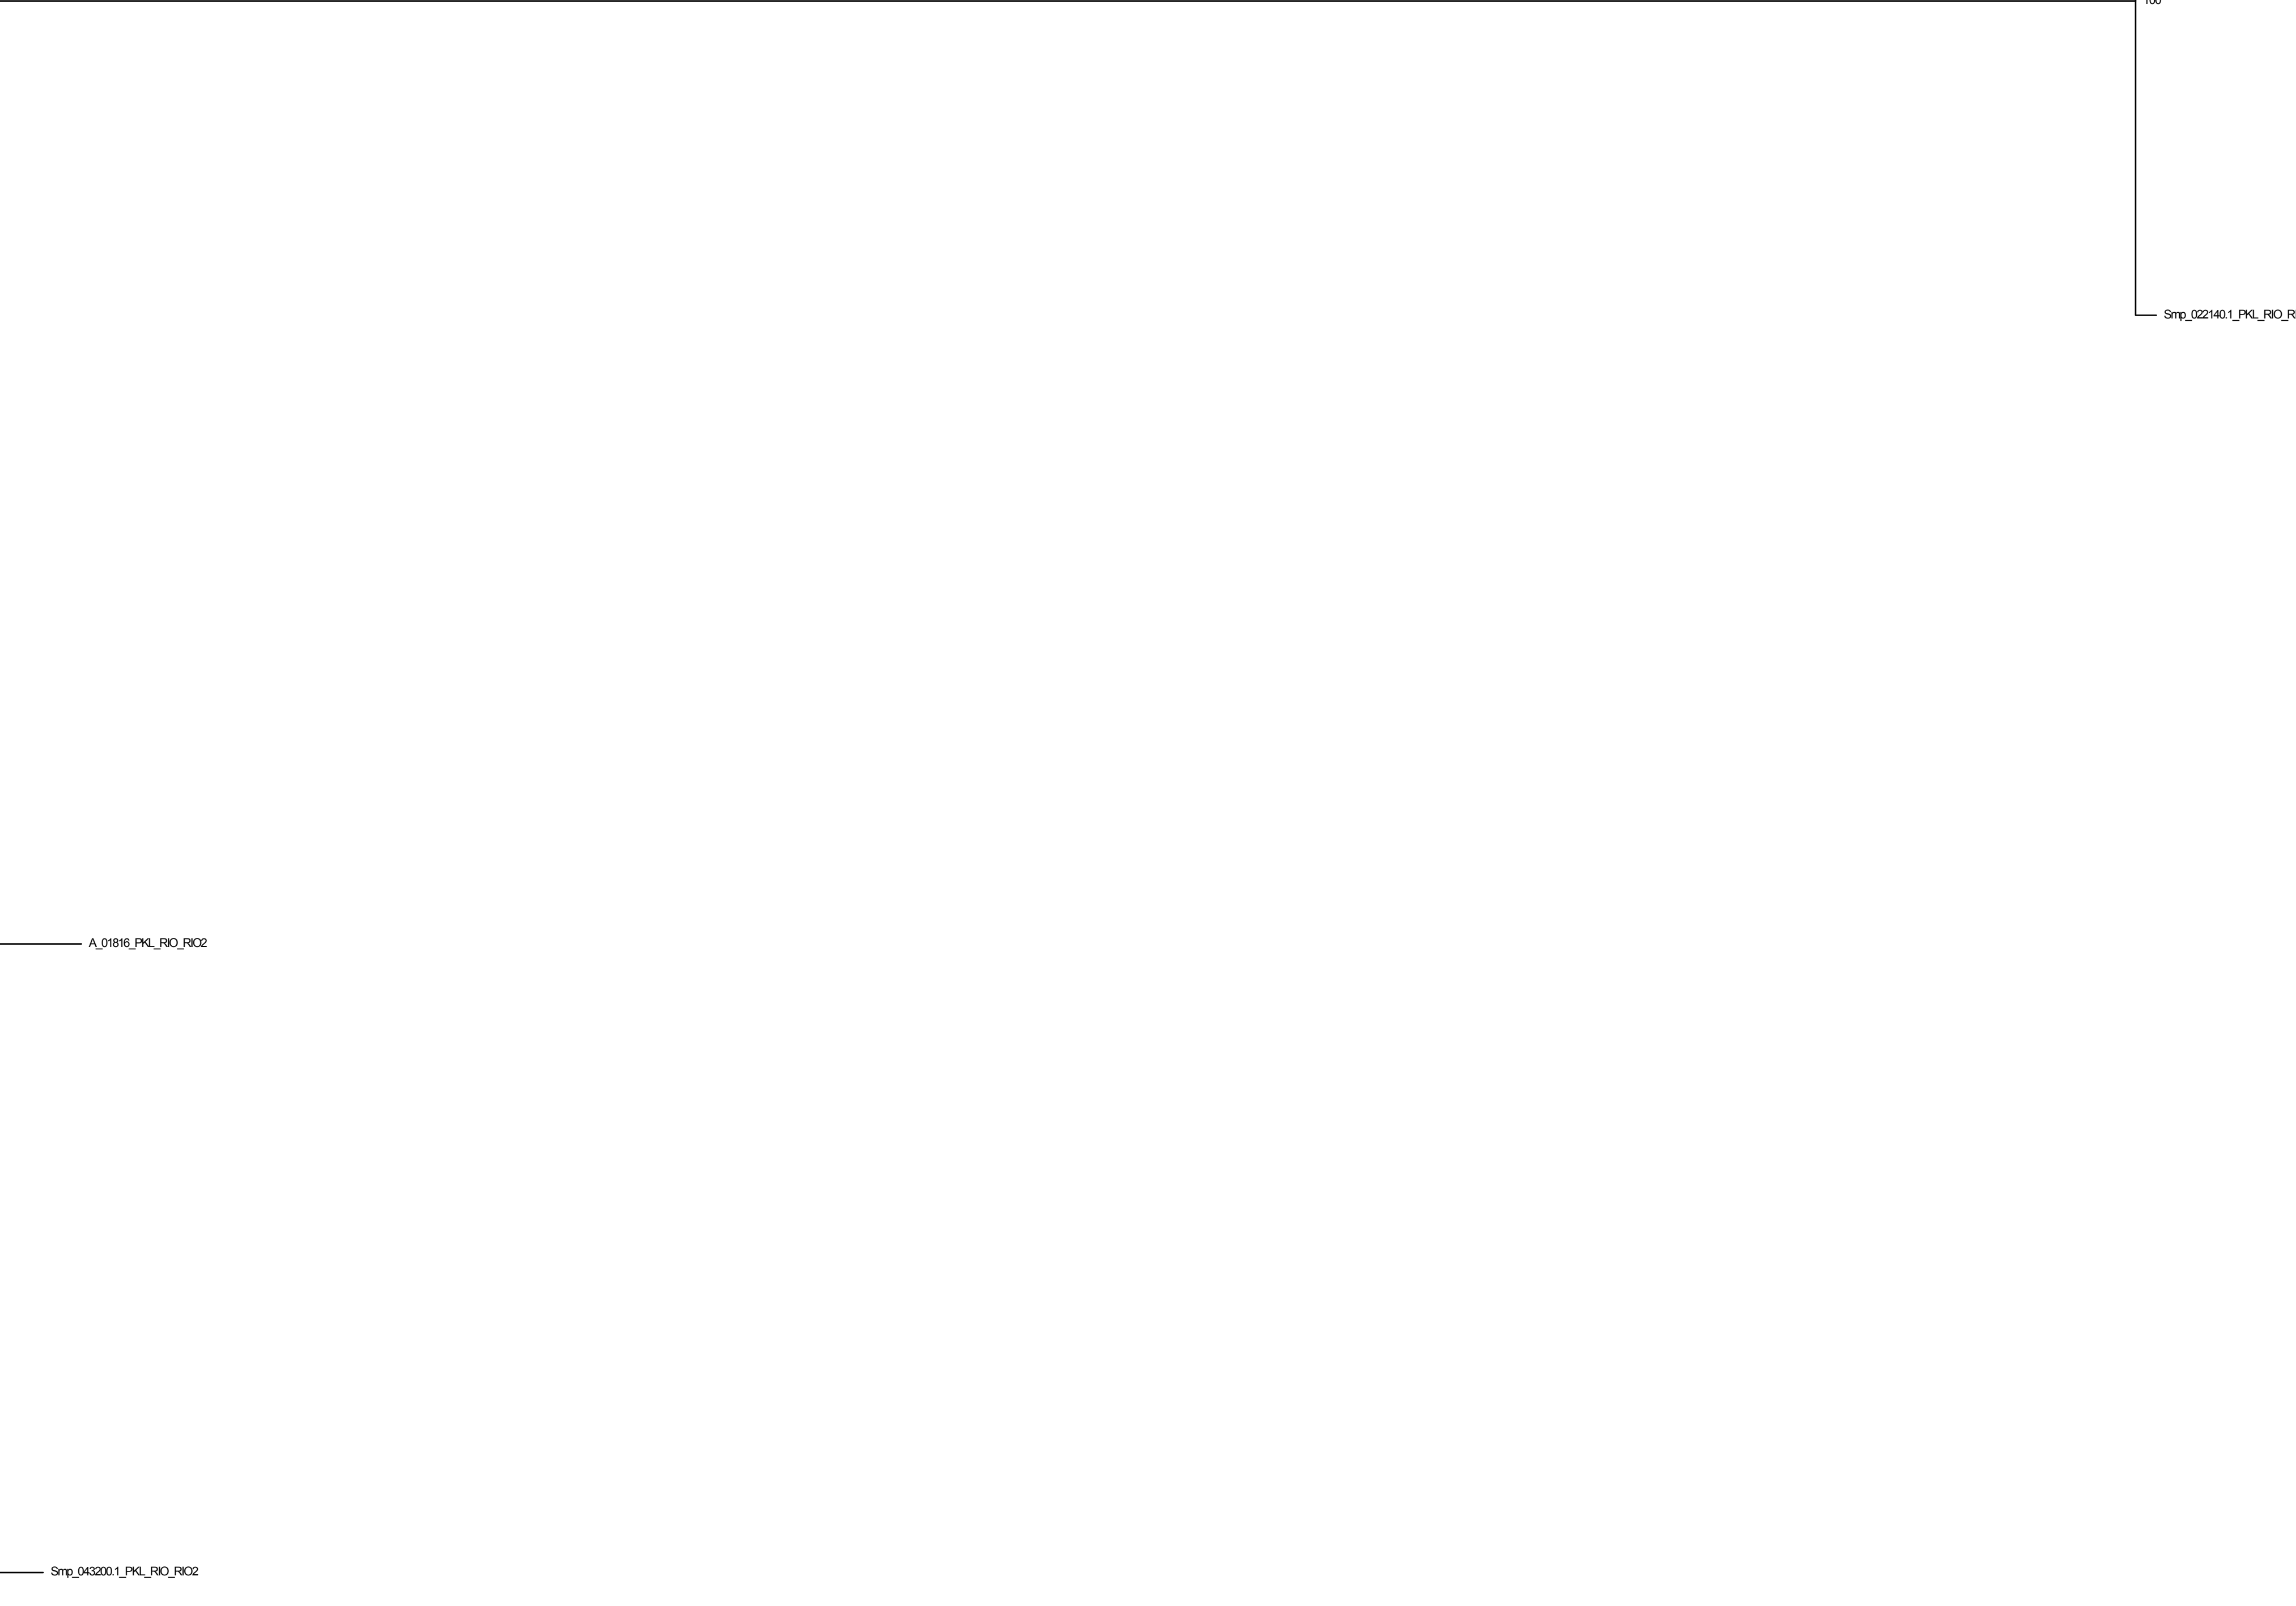

# Supplementary Figure 11. ABC kinase family

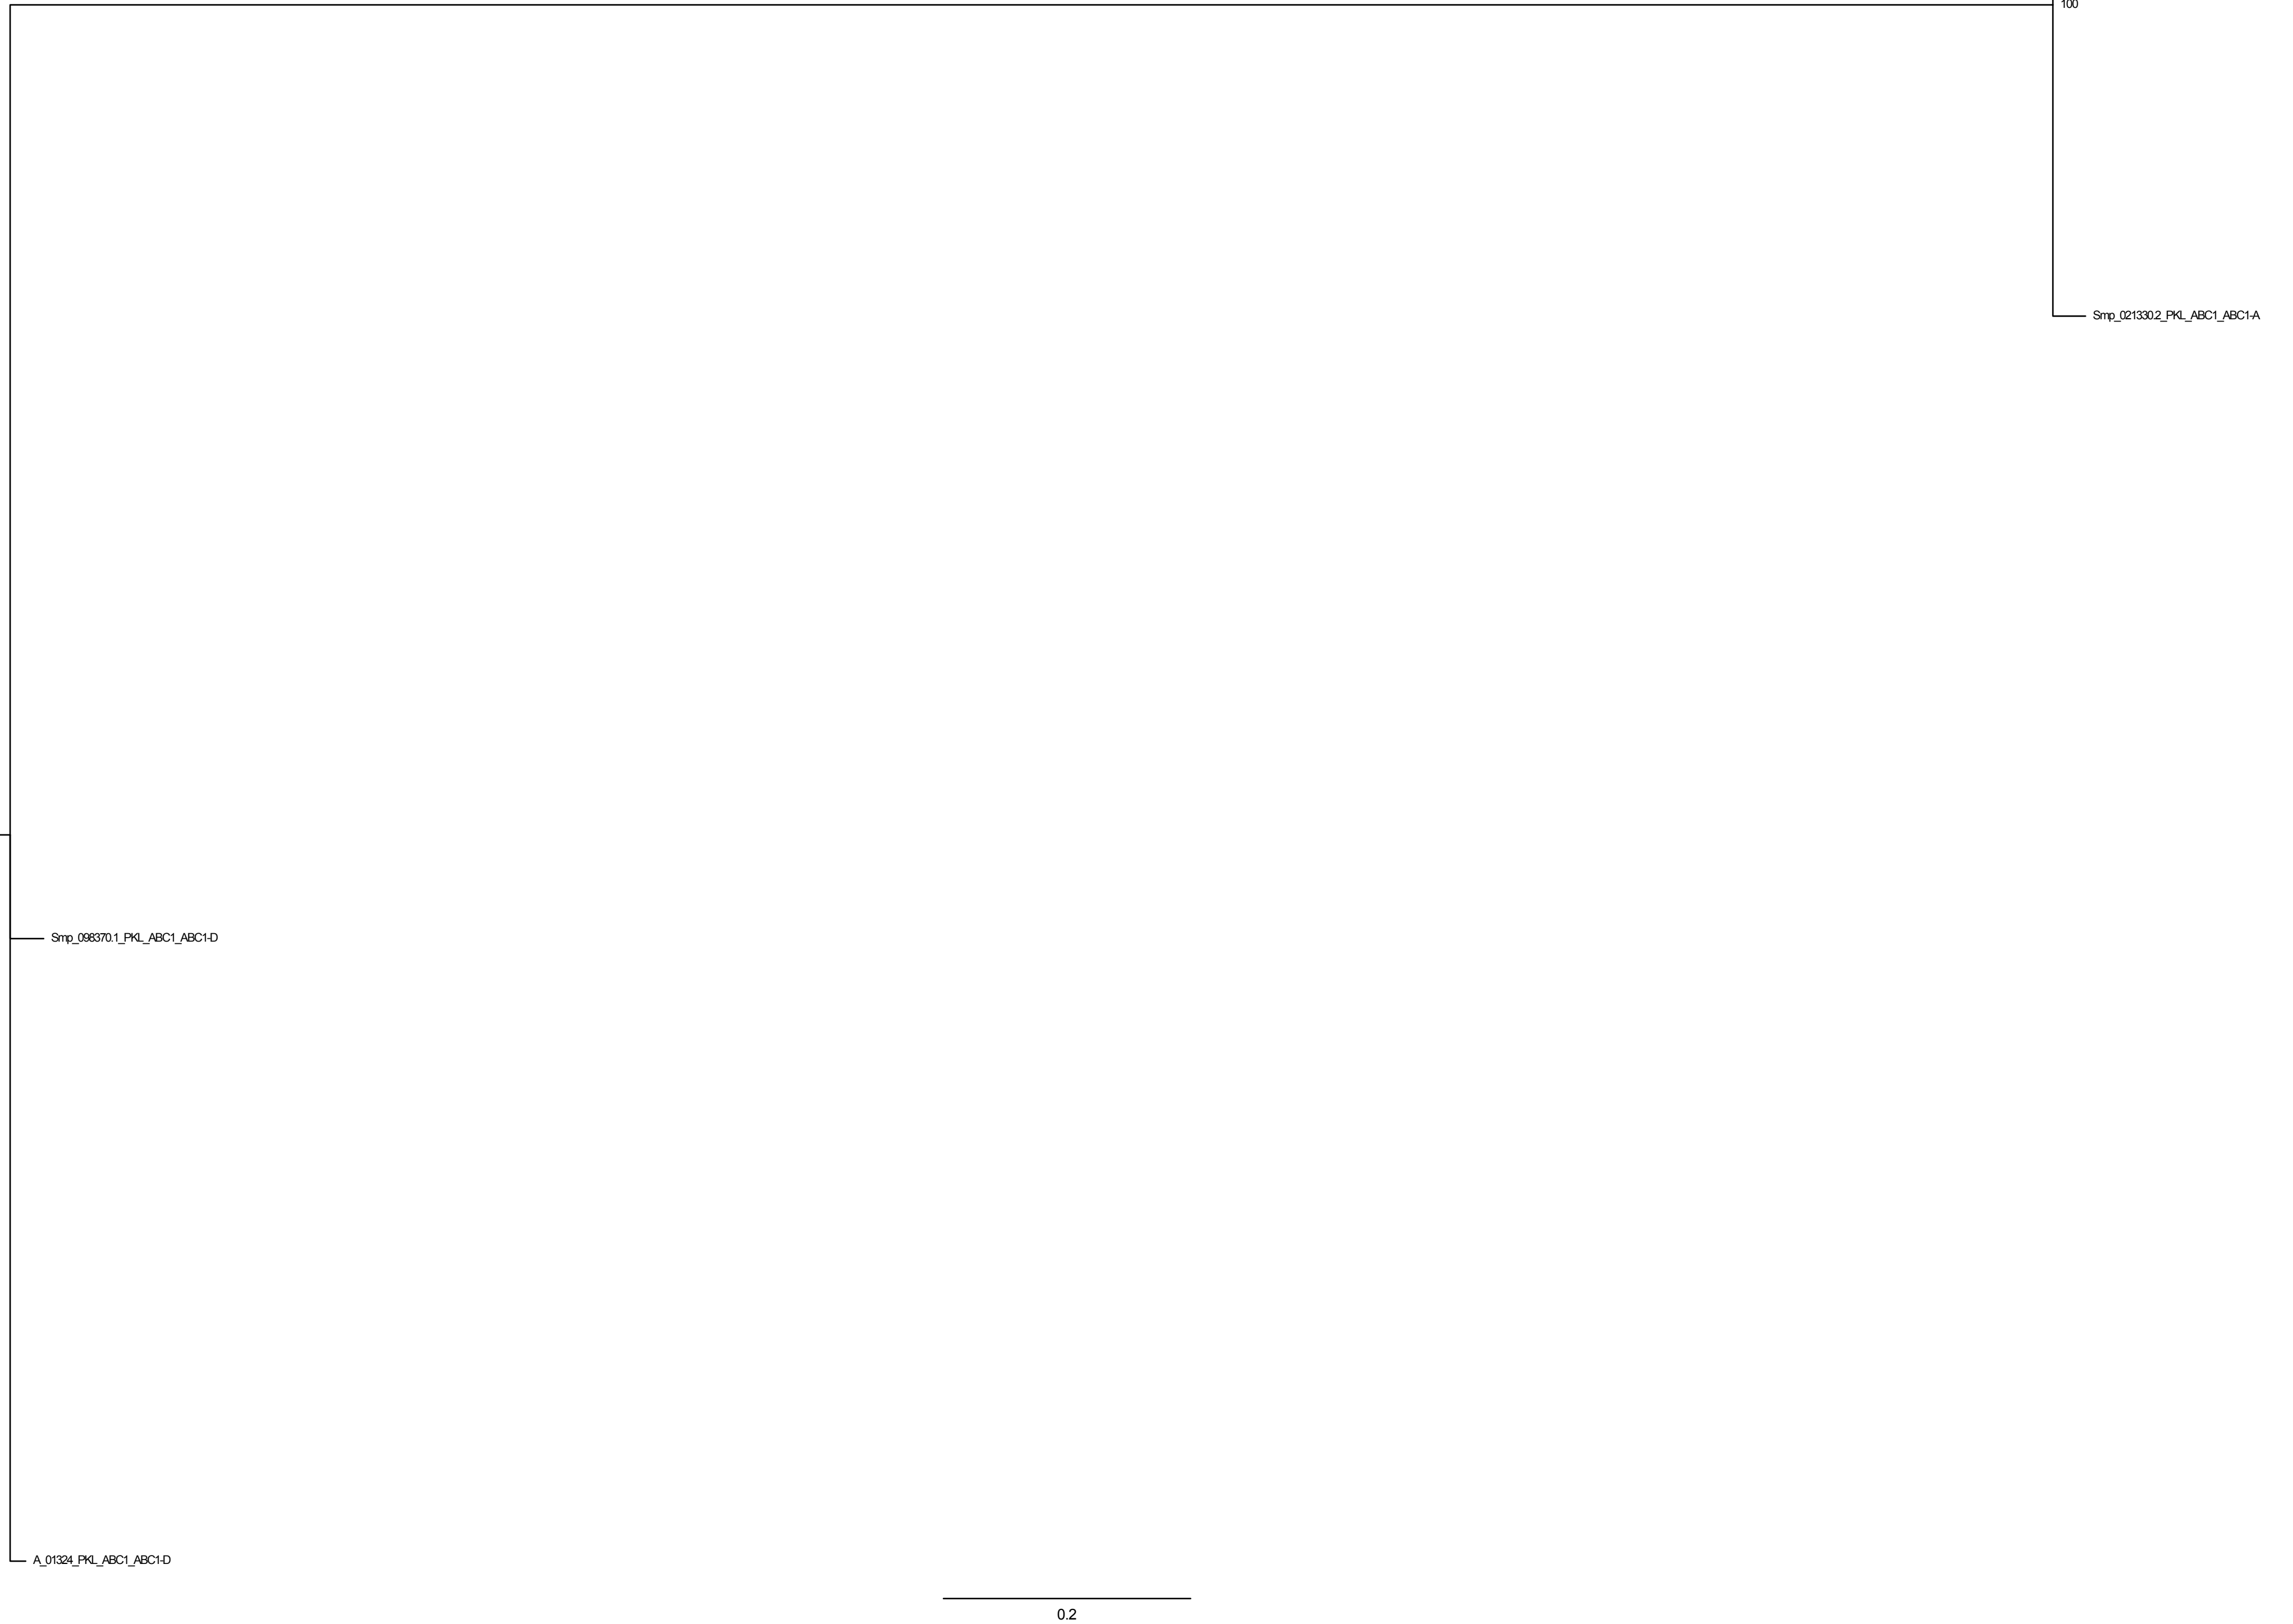

Supplement: srep17759-s1.pdf [file srep17759-s1.pdf]
